# Supplementary material for: Sociodemographic and Lifestyle Factors and Epigenetic Aging in US Young Adults: NIMHD Social Epigenomics Program
Source: PubMed Central journal article supplement (PMC11287395; doi:10.1001/jamanetworkopen.2024.27889), 2024-07-29
Supplement: jamanetwopen-e2427889-s003.pdf [file jamanetwopen-e2427889-s003.pdf]

## Data Sharing Statement

Harris. Sociodemographic and Lifestyle Factors and Epigenetic Aging in US Young Adults. *JAMA Netw Open*. Published online July 29, 2024. doi:10.1001/jamanetworkopen.2024.27889

### Data

**Data available:** Yes

**Data types:** Deidentified participant data **How to access data:**

[kathie\\_harris@unc.edu](mailto:kathie_harris@unc.edu) **When available:** beginning date: 04-01-2025

### Supporting Documents

**Document types:** None

### Additional Information

**Who can access the data:** researchers who apply for a restricted data contract.

**Types of analyses:** Any research-based analysis

**Mechanisms of data availability:** With a signed data use agreement
